# Supplementary material for: Boosts in brain signal variability track liberal shifts in decision bias
Source: eLife. 2020 Aug 3;9:e54201. doi: 10.7554/eLife.54201 (PMC7398662; doi:10.7554/eLife.54201)
Supplement: Figure 3—source data 2. [file elife-54201-fig3-data2.csv]

Participant	Time	mse	crit
1	1	0.0227819665	-0.9588287751
1	2	0.01842681412	-1.310270401
1	3	0.02109016648	-1.719799018
1	4	0.03003554683	-1.397573263
1	5	-0.01595169562	-1.98527788
1	6	-0.01224275868	-1.898033265
1	7	0.06296419071	-1.924819926
1	8	0.02932261669	-2.192172017
1	9	-0.04084794966	-1.492575399
2	1	0.009357281395	-2.010764451
2	2	-0.01692368944	-1.375823846
2	3	0.02219392107	-1.392400018
2	4	0.02703742529	-1.814502043
2	5	0.06000540316	-1.286868499
2	6	0.02569244449	-1.40057197
2	7	0.1051093644	-1.633650521
2	8	-0.003654040129	-1.67962533
2	9	-0.009567499854	-0.5639406375
3	1	-0.02322632691	-0.4904216102
3	2	0.01147596598	-0.9965906515
3	3	-0.0004967436138	0.1094455854
3	4	0.02952089782	-0.2918893027
3	5	-0.01525405	-0.1888456488
3	6	-0.01308992856	-0.6084320078
3	7	-0.03094065077	-0.546145213
3	8	-0.02571967547	0.05805340137
3	9	-0.01917043941	-0.1765899609
4	1	0.01441330645	-0.8164161635
4	2	0.04931189347	-1.174779172
4	3	0.02011560212	-1.096692381
4	4	-0.02174075356	-0.9428110098
4	5	0.08103692709	-0.6868941154
4	6	-0.04322135341	-0.6123687849
4	7	NaN	NaN
4	8	NaN	NaN
4	9	NaN	NaN
5	1	0.003869675102	-1.356252803
5	2	-0.0008978146303	-1.593726121
5	3	0.005858090122	-1.574278845
5	4	0.01675597931	-1.972868942
5	5	-0.01885420959	-1.821298589
5	6	0.01502916294	-1.816791527
5	7	0.04867788088	-2.186337611
5	8	0.04810604232	-1.735335716
5	9	0.005881454222	-2.321296226
6	1	-0.007181168291	-0.513084736
6	2	-0.007202661658	-0.2382148902
6	3	0.001057702843	-0.5000130431
6	4	-0.008097156168	-0.8569313524
6	5	-0.02182255106	-0.3708572661
6	6	0.007852939349	-0.4149095734
6	7	0.01144423473	-0.5540437113
6	8	-0.0244443094	-0.6919921581
6	9	-0.0173267575	-0.1251320863
7	1	0.01918015758	-0.1037785791
7	2	-0.004618515562	-1.268823843
7	3	NaN	NaN
7	4	-0.064583313	-0.7857288105
7	5	-0.01926485297	-0.8723223192
7	6	-0.02712874094	-0.5319978296
7	7	-0.0833124171	0.1714137205
7	8	NaN	-0.05627516202
7	9	NaN	NaN
8	1	0.01708983105	-0.5196559779
8	2	-0.01609004722	-0.06055704503
8	3	0.02204691813	-0.4637523931
8	4	0.004326599749	-0.6500549832
8	5	-0.1288314126	-0.6028784198
8	6	-0.0265289949	-0.7692526611
8	7	-0.06075582882	-1.039518219
8	8	-0.07898323132	-0.6943289684
8	9	-0.02310163171	-0.7285529247
9	1	0.005602342297	-0.05660734355
9	2	-0.03280678968	-1.102745402
9	3	-0.08884287553	NaN
9	4	NaN	NaN
9	5	-0.0594014493	0.0754096038
9	6	-0.03883278169	-0.5100279187
9	7	-0.04232449176	-0.2460715049
9	8	-0.0907681162	-0.3093232877
9	9	-0.0002913220299	-0.1815178638
10	1	-0.005728137614	-0.4386512432
10	2	-0.037724311	-0.3518766712
10	3	NaN	NaN
10	4	0.01121457514	-1.156330318
10	5	-0.00347895357	-0.7250302868
10	6	-0.01419880912	-0.4794663123
10	7	0.01875233616	-1.02524273
10	8	-0.004383805466	-0.4398276737
10	9	-0.03462552614	-0.1298643002
11	1	-0.01961113178	-0.3619383159
11	2	0.0117042526	-1.38308393
11	3	-0.01527460904	-1.531357764
11	4	0.005404723955	-0.4759630148
11	5	-0.0009018010037	-0.4209045031
11	6	-0.00777472996	-0.7114492314
11	7	0.003200673622	-1.111414583
11	8	0.003637896672	-0.1245602735
11	9	0.007444139015	-0.4742857148
12	1	0.04481634639	NaN
12	2	0.0473920553	-1.360226219
12	3	0.1210404181	-1.538958688
12	4	-0.008418613602	-1.274828424
12	5	0.02155425538	-1.827011047
12	6	0.001997761292	-1.627161794
12	7	-0.03860317919	-1.343643554
12	8	0.001581847632	-1.011186622
12	9	0.02944222218	-0.979165309
13	1	0.00340204686	-1.02747552
13	2	0.01473545622	-0.9702561695
13	3	0.07662633094	-1.952579588
13	4	0.03766861083	-1.450118791
13	5	0.07067273771	-1.262264086
13	6	-0.02218369367	-0.5726569419
13	7	0.04338101757	-0.7874302134
13	8	0.02294924107	-0.9704795923
13	9	0.02786151766	-0.5865430242
14	1	0.04047424929	-1.139661794
14	2	0.03909289952	-0.6511301627
14	3	0.005443835595	-0.4533062818
14	4	-0.0272332049	-0.4985525026
14	5	0.01630849016	-0.8398741762
14	6	-0.02431914829	-0.5738206588
14	7	0.006090316295	-0.4660283374
14	8	0.01821610136	-0.852288003
14	9	NaN	NaN
15	1	NaN	-0.4200847943
15	2	0.006270439229	-0.16051424
15	3	0.01463254921	-0.2173876594
15	4	0.01153753532	-0.1929465173
15	5	0.00326847865	-0.4545375266
15	6	0.002640438742	-0.387187252
15	7	-0.003955550296	0.1135068728
15	8	-0.01748137033	-0.2841114417
15	9	-0.01007206783	-0.6220575995
